# Supplementary material for: Archetypal sandwich-structured CuO for high performance non-enzymatic sensing of glucose
Source: Royal Society of Chemistry journal article supplement (doi:10.1039/c2nr33264g), 2013-01-01
Supplement: c2nr33264g.pdf [file c2nr33264g.pdf]

## Supplementary Information

### Archetype Sandwich Structured CuO for High Performance Non-enzymatic Sensing of Glucose

Sumanta Kumar Meher and G Ranga Rao\*

*Department of Chemistry, Indian Institute of Technology Madras, Chennai – 600036, India*

*E-mail: [grrao@iitm.ac.in](mailto:grrao@iitm.ac.in)*

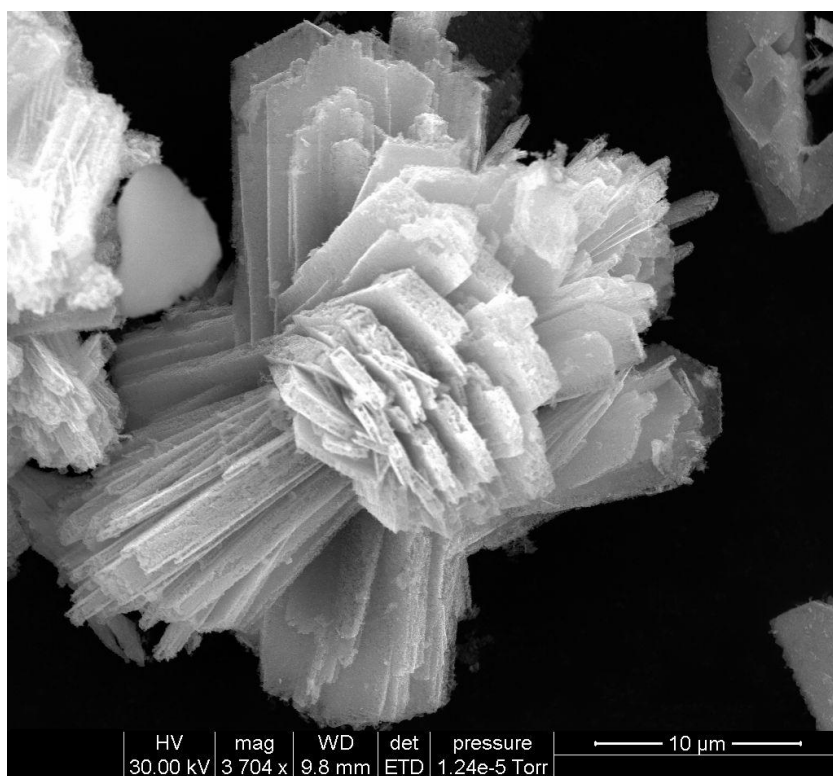

**Fig. S1** FESEM image of  $\text{Cu}_2(\text{OH})_2\text{CO}_3$  precursor sample.
